# Supplementary material for: REVIEW: Emerging viral disease risk to pollinating insects: ecological, evolutionary and anthropogenic factors
Source: PubMed Central journal article supplement (PMC4415536; doi:10.1111/1365-2664.12385), 2015-01-16
Supplement: JPE-52-331-s001.pdf [file JPE-52-331-s001.pdf]

Table S1. The global presence and estimated prevalence of the eight most common viruses of *Apis mellifera*, plus conditions that trigger pathogenicity and where they've been implicated in recent serious colony losses. Virus abbreviations: DWV - Deformed wing virus, SBV - Sacbrood virus, BQCV - Black queen cell virus, KBV - Kashmir bee virus, ABPV - acute bee paralysis virus, IAPV - Israeli acute paralysis virus, SBPV - Slow bee paralysis virus, CBPV - Chronic bee paralysis virus. Prevalence was estimated using data collected from the following surveys: (Tentcheva *et al.* 2004; Berényi *et al.* 2006; Chen *et al.* 2006; Gauthier *et al.* 2007; Ward *et al.* 2007; Nielson, Nicolaisen & Kryger 2008; Welch *et al.* 2009; Carreck, Ball & Martin 2010; Genersch *et al.* 2010; Singh *et al.* 2010; Runckel *et al.* 2011) (High prevalence +++, medium prevalence ++ and low prevalence +).

\*An expanded survey could not confirm this result (vanEngelsdorp *et al.* 2009)

| <b>Virus</b> | <b>Global presence</b>            | <b>% prevalence estimate</b>        | <b>Pathogenicity association</b>                   | <b>Colony losses</b>                                                    |
|--------------|-----------------------------------|-------------------------------------|----------------------------------------------------|-------------------------------------------------------------------------|
| <b>DWV</b>   | Every continent except Oceania    | >80% (+++)                          | <i>Varroa</i> (Bowen-Walker, Martin & Gunn 1999)   | Germany (Genersch <i>et al.</i> 2010); UK (Carreck, Ball & Martin 2010) |
| <b>SBV</b>   | Every continent                   | 10-90% (++)                         | Seasonal, brood density                            |                                                                         |
| <b>BQCV</b>  | Every continent                   | >80% (+++)                          | <i>Nosema</i> (Bailey 1982)                        |                                                                         |
| <b>KBV</b>   | N. America, Oceania and Europe    | <20% (++)                           | <i>Varroa</i> (Chen <i>et al.</i> 2004)            |                                                                         |
| <b>ABPV</b>  | Every continent except Oceania    | High, variable (++)                 | <i>Varroa</i> (Genersch <i>et al.</i> 2010)        | Germany (Genersch <i>et al.</i> 2010)                                   |
| <b>IAPV</b>  | N. America, Oceania and Europe    | <25% in Europe, high elsewhere (++) | <i>Varroa</i> (Di Prisco <i>et al.</i> 2011)       | USA (Cox-Foster 2007)*                                                  |
| <b>SBPV</b>  | Europe and Oceania                | <2% (+)                             | <i>Varroa</i> (Carreck, Ball & Martin 2010)        | UK (Carreck, Ball & Martin 2010)                                        |
| <b>CBPV</b>  | Every continent except S. America | <10% (+)                            | Colony Density (Ribière, Olivier & Blanchard 2010) |                                                                         |

## References

- Bailey, L. (1982) Viruses of honeybees. *Bee World*, **63**, 165-173.
- Berényi, O., Bakonyi, T., Derakhshifar, I., Koglberger, H. & Nowotny, N. (2006) Occurrence of six honeybee viruses in diseased Austrian apiaries. *Applied and Environmental Microbiology*, **72**, 2414-2420.
- Bowen-Walker, P.L., Martin, S.J. & Gunn, A. (1999) The transmission of deformed wing virus between honeybees (*Apis mellifera* L.) by the ectoparasitic mite *Varroa jacobsoni* Oud. *Journal of Invertebrate Pathology*, **73**, 101-106.
- Carreck, N.L., Ball, B.V. & Martin, S.J. (2010) Honey bee colony collapse and changes in viral prevalence associated with *Varroa destructor*. *Journal of Apicultural Research*, **49**, 93-94.
- Chen, Y., Pettis, J., Collins, A. & Feldlaufer, M. (2006) Prevalence and transmission of honeybee viruses. *Applied and Environmental Microbiology*, **72**, 606-611.

- Chen, Y., Pettis, J.S., Evans, J.D., Kramer, M. & Feldlaufer, M. (2004) Transmission of Kashmir bee virus by the ectoparasitic mite *Varroa destructor*. *Apidologie*, **35**, 441-448.
- Cox-Foster, D.L. (2007) A metagenomic survey of microbes in honey bee colony collapse disorder. *Science*, **318**, 283-287.
- Di Prisco, G., Pennacchio, F., Caprio, E., Boncristiani Jr, H.F., Evans, J. & Chen, Y. (2011) *Varroa destructor* is an effective vector of Israeli acute paralysis virus in the honeybee, *Apis mellifera*. *Journal of General Virology*, **92**, 151-155.
- Gauthier, L., Tentcheva, D., Tournaire, M., Dainat, B., Cousserans, F., Colin, M.E. & Bergoin, M. (2007) Viral load estimation in asymptomatic honey bee colonies using the quantitative RT-PCR technique. *Apidologie*, **38**, 426-435.
- Genersch, E., von der Ohe, W., Kaatz, H., Schroeder, A., Otten, C., Büchler, R., Berg, S., Ritter, W., Mühlen, W., Gisder, S., Meixner, M., Liebig, G. & Rosenkranz, P. (2010) The German bee monitoring project: a long term study to understand periodically high winter losses of honey bee colonies. *Apidologie*, **41**, 332-352.
- Nielson, S.L., Nicolaisen, M. & Kryger, P. (2008) Incidence of Acute bee paralysis virus, Black queen cell virus, Chronic bee paralysis virus, Deformed wing virus, Kashmir bee virus and sacbrood virus in honey bees (*Apis mellifera*) in Denmark. *Apidologie*, **39**, 310-314.
- Ribi re, M., Olivier, V. & Blanchard, P. (2010) Chronic bee paralysis: a disease and a virus like no other? *Journal of Invertebrate Pathology*, **103**, S120-S131.
- Runckel, C., Flenniken, M.L., Engel, J.C., Ruby, J.G., Ganem, D., Andino, R. & DeRisi, J.L. (2011) Temporal analysis of the honey bee microbiome reveals four novel viruses and seasonal prevalence of known viruses, *Nosema*, and *Crithidia*. *PLoS ONE*, **6**, e20656.
- Singh, R., Levitt, A.L., Rajotte, E.G., Holmes, E.C., Ostiguy, N., vanEngelsdorp, S., Lipkin, W.I., dePamphillis, C.W., Toth, A.L. & Cox-Foster, D.L. (2010) RNA viruses in hymenopteran pollinators: Evidence of inter-taxa virus transmission via pollen and potential impact on non-*Apis* hymenopteran species. *PLoS ONE*, **5**, e14357.
- Tentcheva, D., Gauthier, L., Zappulla, N., Dainat, B., Cousserans, F., Colin, M.E. & Bergoin, M. (2004) Prevalence and seasonal variations of six bee viruses in *Apis mellifera* L. and *Varroa destructor* mite populations in France. *Applied and Environmental Microbiology*, **70**, 7185-7191.
- vanEngelsdorp, D., Evans, D.J., Saegerman, C., Mullin, C., Haubruge, E., Nguyen, B.K., Frazier, m., Frazier, J., Cox-Foster, D.L., Chen, Y., Underwood, R.M., Tarpay, D.R. & Pettis, J. (2009) Colony collapse disorder: A descriptive study. *PLoS ONE*, **4**, e6481.
- Ward, L., Waite, R., Boonham, N., Fisher, T., Pescod, K., Thompson, H., Chantawannakul, P. & Brown, M. (2007) First detection of Kashmir bee virus in the UK using real-time PCR. *Apidologie*, **38**, 181-190.
- Welch, A., Drummond, F., Tewari, S., Averill, A. & Burand, J.P. (2009) Presence and prevalence of viruses in local and migratory honeybees (*Apis mellifera*) in Massachusetts. *Applied and Environmental Microbiology*, **75**, 7862-7865.
