# Supplementary material for: REVIEW: Emerging viral disease risk to pollinating insects: ecological, evolutionary and anthropogenic factors
Source: PubMed Central journal article supplement (PMC4415536; doi:10.1111/1365-2664.12385), 2015-01-16
Supplement: JPE-52-331-s002.pdf [file JPE-52-331-s002.pdf]

Table S2. A list of the viruses isolated from *Apis mellifera* that have been sequenced to date (all positive single-stranded RNA genotype), their families, and references. Note: several viruses are so closely related that it is yet to be determined if they are actually members of same species e.g. DWV/VDV-1/KV; ABPV/KBV/IAPV; and LSV-1/LSV-2.

| Virus                         | Abbr. | Family                                               | References                                                                                          |
|-------------------------------|-------|------------------------------------------------------|-----------------------------------------------------------------------------------------------------|
| Deformed Wing Virus           | DWV   | Iflaviridae                                          | de Miranda and Genersch (2010)                                                                      |
| Kakugo Virus                  | KV    | Iflaviridae                                          | Fujiyuki <i>et al.</i> (2004)                                                                       |
| Sacbrood Virus                | SBV   | Iflaviridae                                          | Bailey and Fernando (1972), Ghosh <i>et al.</i> (1999)                                              |
| Varroa Destructor Virus-1     | VDV-1 | Iflaviridae                                          | Ongus <i>et al.</i> (2004)                                                                          |
| Slow Bee Paralysis Virus      | SBPV  | Iflaviridae                                          | Bailey and Woods (1974), de Miranda <i>et al.</i> (2010)                                            |
| Acute Bee Paralysis Virus     | ABPV  | Dicistroviridae                                      | Bailey, Gibbs and Woods (1963), de Miranda, Cordoni and Budge (2010)                                |
| Israeli Acute Paralysis Virus | IAPV  | Dicistroviridae                                      | Maori <i>et al.</i> (2007)                                                                          |
| Kashmir Bee Virus             | KBV   | Dicistroviridae                                      | Bailey and Woods (1977), de Miranda <i>et al.</i> (2004)                                            |
| Aphid Lethal Paralysis virus  | ALPV  | Dicistroviridae                                      | Runckel <i>et al.</i> (2011)                                                                        |
| Big Sioux River virus         | BSRV  | Dicistroviridae                                      | Runckel <i>et al.</i> (2011)                                                                        |
| Black Queen Cell Virus        | BQCV  | Dicistroviridae                                      | Bailey and Woods (1977), Leat <i>et al.</i> (2000)                                                  |
| Chronic Bee Paralysis Virus   | CBPV  | Unassigned, related to Nodaviridae and Tombusviridae | Bailey, Gibbs and Woods (1963), Olivier <i>et al.</i> (2008), Ribière, Olivier and Blanchard (2010) |
| Lake Sinai Virus 1 & 2        | LSV   | Unassigned, related to Nodaviridae and Tombusviridae | Runckel <i>et al.</i> (2011)                                                                        |
| Tobacco Ring Spot Virus       | TRSV  | Comoviridae                                          | Li <i>et al.</i> (2014)                                                                             |

## References

- Bailey, L. & Fernando, E.F. (1972) Effects of Sacbrood Virus on adult honey bees. *Annals of Applied Biology*, **72**, 27-&.
- Bailey, L., Gibbs, A.J. & Woods, R.D. (1963) Two viruses from adult honey bees (*Apis mellifera* Linnaeus). *Virology* **21**, 390-395.
- Bailey, L. & Woods, R.D. (1974) Three previously undescribed viruses from the honey bee. *Journal of General Virology*, **25**, 175-186.
- Bailey, L. & Woods, R.D. (1977) 2 more small RNA viruses from honey bees and further observations on Sacbrood and Acute Bee Paralysis Viruses. *Journal of General Virology*, **37**, 175-182.
- de Miranda, J.R., Cordoni, G. & Budge, G. (2010) The Acute bee paralysis virus-Kashmir bee virus-Israeli acute paralysis virus complex. *Journal of Invertebrate Pathology*, **103**, S30-S47.
- de Miranda, J.R., Dainat, B., Locke, B., Cordoni, G., Berthoud, H., Gauthier, L., Neumann, P., Budge, G.E., Ball, B.V. & Stoltz, D.B. (2010) Genetic characterization of Slow Bee Paralysis Virus of the honeybee (*Apis mellifera* L.). *Journal of General Virology*, **91**, 2524-2530.
- de Miranda, J.R., Drebot, M., Tyler, S., Shen, M., Cameron, C.E., Stoltz, D.B. & Camazine, S.M. (2004) Complete nucleotide sequence of Kashmir bee virus and comparison with acute bee paralysis virus. *Journal of General Virology*, **85**, 2263-2270.
- de Miranda, J.R. & Genersch, E. (2010) Deformed Wing Virus. *Journal of Invertebrate Pathology*, **103**, S48-S61.
- Fujiyuki, T., Takeuchi, H., Ono, M., Ohka, S., Sasaki, T., Nomoto, A. & Kubo, T. (2004) Novel insect picorna-like virus identified in the brains of aggressive worker honeybees. *Journal of Virology*, **78**, 1093-1100.

- Ghosh, R.C., Ball, B.V., Willcocks, M.M. & Carter, M.J. (1999) The nucleotide sequence of Sacbrood Virus of the honey bee: an insect picorna-like virus. *Journal of General Virology*, **80**, 1541-1549.
- Leat, N., Ball, B., Govan, V. & Davison, S. (2000) Analysis of the complete genome sequence of Black Queen Cell Virus, a picorna-like virus of honey bees. *Journal of General Virology*, **81**, 2111-2119.
- Li, J.L., Cornman, R.S., Evans, J.D., Pettis, J.S., Zhao, Y., Murphy, C., Peng, W.J., Wu, J., Hamilton, M., Boncristiani, H.F.J., Zhou, L., Hammond, J. & Chen, Y.P. (2014) Systemic spread and propagation of a plant-pathogenic virus in European honeybees, *Apis mellifera*. *mBio*, **5**, e00898-00813.
- Maori, E., Lavi, S., Mozes-Koch, R., Gantman, Y., Peretz, Y., Edelbaum, O., Tanne, E. & Sela, I. (2007) Isolation and characterization of Israeli acute paralysis virus, a discistrovirus affecting honeybees in Israel: evidence for diversity due to intra- and inter-species recombination. *Journal of General Virology*, **88**, 3428-3438.
- Olivier, V., Blanchard, P., Chaouch, S., Lallemand, P., Schurr, F., Celle, O., Dubois, E., Tordo, N., Thiery, R., Houlgatte, R. & Ribière, M. (2008) Molecular characterisation and phylogenetic analysis of Chronic bee paralysis virus, a honey bee virus. *Virus Research*, **132**, 59-68.
- Ongus, J.R., Peters, D., Bonmatin, J., Bengsch, E., Vlak, J.M. & van Oers, M.M. (2004) Complete sequence of a picorna-like virus of the genus *Iflavirus* replicating in the mite *Varroa destructor*. *Journal of General Virology*, **85**, 3747-3755.
- Ribière, M., Olivier, V. & Blanchard, P. (2010) Chronic bee paralysis: a disease and a virus like no other? *Journal of Invertebrate Pathology*, **103**, S120-S131.
- Runckel, C., Flenniken, M.L., Engel, J.C., Ruby, J.G., Ganem, D., Andino, R. & DeRisi, J.L. (2011) Temporal analysis of the honey bee microbiome reveals four novel viruses and seasonal prevalence of known viruses, *Nosema*, and *Crithidia*. *PLoS ONE*, **6**, e20656.
