# Supplementary material for: REVIEW: Emerging viral disease risk to pollinating insects: ecological, evolutionary and anthropogenic factors
Source: PubMed Central journal article supplement (PMC4415536; doi:10.1111/1365-2664.12385), 2015-01-16
Supplement: JPE-52-331-s004.pdf [file JPE-52-331-s004.pdf]

Table S4. Virus host range for the eight most common RNA viruses of *Apis mellifera* (virus abbreviations: DWV - Deformed wing virus, BQCV - Black queen cell virus, ABPV - Acute bee paralysis virus, SBPV - Slow bee paralysis virus, SBV - Sacbrood virus, KBV - Kashmir bee virus, IAPV - Israeli acute paralysis virus, CBPV - Chronic bee paralysis virus).

| Virus                        | Host                     | Location                            | Sample n                      | ~ % n infected   | Replication  | Symptomatic          | Ref.                   |
|------------------------------|--------------------------|-------------------------------------|-------------------------------|------------------|--------------|----------------------|------------------------|
| DWV                          | <i>Bombus terrestris</i> | Europe commercial                   | no data                       | 10%              | Not tested   | Y*                   | Genersch et al. (2006) |
|                              |                          | UK, mainly southwest                | 57                            | 30%              | Not tested   | N                    | Evison et al. (2012)   |
|                              |                          | Scotland, UK                        | Unpublished data              | Unpublished data | Not tested   | N                    | McMahon pers. comm.    |
|                              | <i>Bombus pascuorum</i>  | UK                                  | 170                           | 9                | Y            | N                    | Fürst et al. (2014)    |
|                              |                          | Germany                             | 1 wild nest                   | No data          | Not tested   | N                    | Genersch et al. (2006) |
|                              |                          | UK, mainly southwest                | 36                            | 14%              | Not tested   | N                    | Evison et al. (2012)   |
|                              | <i>Bombus lucorum</i>    | UK                                  | 60                            | 4                | N            | N                    | Fürst et al. (2014)    |
|                              |                          | Scotland, UK                        | Unpublished data              | Unpublished data | Not tested   | N                    | McMahon pers. comm.    |
|                              | <i>Bombus lapidarius</i> | UK                                  | 175                           | 16               | Y            | N                    | Fürst et al. (2014)    |
|                              | <i>Bombus huntii</i>     | Utah, USA                           | 30                            | no data          | Y (gut only) | N                    | Li et al. (2011)       |
|                              | <i>Bombus impatiens</i>  | Pennsylvania, USA                   | 5                             | 100%             | Not tested   | N                    | Singh et al. (2010)    |
|                              |                          | Pennsylvania, USA                   | 13                            | 62%              | Y            | N                    | Levitt et al. (2013)   |
|                              | <i>Bombus vagans</i>     | Pennsylvania, USA                   | 2                             | 50%              | Y            | N                    | Levitt et al. (2013)   |
|                              | <i>Bombus tenarius</i>   | Pennsylvania, USA                   | 2                             | 100%             | Not tested   | N                    | Singh et al. (2010)    |
|                              | <i>Bombus hortorum</i>   | UK                                  | 20                            | 0                | n/a          | n/a                  | Fürst et al. (2014)    |
| <i>Bombus monticola</i>      | UK                       | 10                                  | 11                            | Y                | N            | Fürst et al. (2014)  |                        |
| <i>Osmia bicornis</i>        | Belgium                  | 3 pooled samples<br>(10 per sample) | n/a                           | Not tested       | N            | Ravoet et al. (2014) |                        |
| <i>Vesputa vulgaris</i>      | UK, mainly southwest     | 45                                  | 29%                           | Not tested       | N            | Evison et al. (2012) |                        |
|                              | Pennsylvania, USA        | 12                                  | 92%                           | Not tested       | N            | Singh et al. (2010)  |                        |
| <i>Vesputa spp.</i>          | Pennsylvania, USA        | 7                                   | 57%                           | Y                | N            | Levitt et al. (2013) |                        |
| <i>Apis cerana</i>           | China (19 provinces)     | 570                                 | 33, 51 and 92% in 3 provinces | Not tested       | n/a          | Li et al. (2011)     |                        |
| <i>Apis florum</i>           | Xishuang province, China | 134                                 | 15.6%                         | Not tested       | n/a          | Zhang et al. (2012)  |                        |
| <i>Apis dorsata</i>          | Xishuang province, China | 190                                 | 11.6%                         | Not tested       | n/a          | Zhang et al. (2012)  |                        |
| <i>Blatella germanica</i>    | Pennsylvania, USA        | 8                                   | 100%                          | Y                | N            | Levitt et al. (2013) |                        |
| <i>Aethina tumida</i>        | Pennsylvania, USA        | 21                                  | 72%                           | Not tested       | N            | Levitt et al. (2013) |                        |
| <i>Forficula auricularia</i> | Pennsylvania, USA        | 10                                  | 100%                          | Y                | N            | Levitt et al. (2013) |                        |
| <i>Galleria mellonella</i>   | Pennsylvania, USA        | 21                                  | 71%                           | N                | N            | Levitt et al. (2013) |                        |
| Araneae (order)              | Pennsylvania, USA        | 10                                  | 80%                           | Not tested       | N            | Levitt et al. (2013) |                        |

|      |                              |                              |                                  |                              |                                      |     |                            |
|------|------------------------------|------------------------------|----------------------------------|------------------------------|--------------------------------------|-----|----------------------------|
|      | <i>Varroa destructor</i>     | UK apiaries (Devon)          | 462 (3 hives)                    | No data                      | Not tested                           | n/a | Bowen-Walker et al. (1999) |
|      |                              | France apiaries (nationwide) | 22,000 (22 apiaries)             | 100%                         | Not tested                           | n/a | Tentcheva et al. (2004)    |
|      |                              | France (360 apiaries)        | 36,000 (36 apiaries)             | No data                      | Not tested                           | n/a | Gauthier et al. (2007)     |
|      |                              | Germany                      | 40 per hive (5 hives)            | 45-100% per hive             | Y (only mites from symptomatic bees) | n/a | Yue and Genersch (2005)    |
| BQCV | <i>B. huntii</i>             | Utah, USA                    | 30                               | No data                      | Y (gut only)                         | N   | Peng et al. (2011)         |
|      | <i>B. terrestris</i>         | Scotland, UK                 | Unpublished data                 | Unpublished data             | Not tested                           | N   | McMahon pers. comm.        |
|      | <i>B. pascuorum</i>          | Scotland, UK                 | Unpublished data                 | Unpublished data             | Not tested                           | N   | McMahon pers. comm.        |
|      | <i>B. lucorum</i>            | Scotland, UK                 | Unpublished data                 | Unpublished data             | Not tested                           | N   | McMahon pers. comm.        |
|      | <i>Bombus hortorum</i>       | Scotland, UK                 | Unpublished data                 | Unpublished data             | Not tested                           | N   | McMahon pers. comm.        |
|      | <i>B. impatiens</i>          | Pennsylvania, USA            | 5                                | 60%                          | Not tested                           | N   | Singh et al. (2010)        |
|      |                              | Pennsylvania, USA            | 13                               | 61%                          | Not tested                           | N   | Levitt et al. (2013)       |
|      | <i>B. tenarius</i>           | Pennsylvania, USA            | 2                                | 50%                          | Not tested                           | N   | Singh et al. (2010)        |
|      | <i>B. vagans</i>             | Pennsylvania, USA            | 1                                | 100%                         | Not tested                           | N   | Singh et al. (2010)        |
|      |                              | Pennsylvania, USA            | 2                                | 100%                         | Not tested                           | N   | Levitt et al. (2013)       |
|      | <i>Osmia cornuta</i>         | Belgium                      | 3 pooled samples (10 per sample) | n/a                          | Not tested                           | N   | Ravoet et al. (2014)       |
|      | <i>Andrena vaga</i>          | Belgium                      | 1 pooled sample (10 in pool)     | n/a                          | Not tested                           | N   | Ravoet et al. (2014)       |
|      | <i>Heriades truncorum</i>    | Belgium                      | 3 pooled samples (10 per sample) | n/a                          | Not tested                           | N   | Ravoet et al. (2014)       |
|      | <i>A. cerana</i>             | China (19 provinces)         | 570                              | 12% – 98% across 6 provinces | Not tested                           | N   | Li et al. (2012)           |
|      | <i>A. florum</i>             | Xishuang province, China     | 134                              | 52%                          | Not tested                           | N   | Zhang et al. (2012)        |
|      | <i>A. dorsata</i>            | Xishuang province, China     | 190                              | 21.6%                        | Not tested                           | N   | Zhang et al. (2012)        |
|      | <i>V. vulgaris</i>           | UK, mainly southwest         | 45                               | 2.2%                         | Not tested                           | N   | Evison et al. (2012)       |
|      |                              | Pennsylvania, USA            | 12                               | 66.7%                        | Not tested                           | N   | Singh et al. (2010)        |
|      | <i>Vespula sp.</i>           | Pennsylvania, USA            | 7                                | 29%                          | Not tested                           | N   | Levitt et al. (2013)       |
|      | <i>Blatella germanica</i>    | Pennsylvania, USA            | 8                                | 50%                          | Not tested                           | N   | Levitt et al. (2013)       |
|      | <i>Aethina tumida</i>        | Pennsylvania, USA            | 21                               | 5%                           | Not tested                           | N   | Levitt et al. (2013)       |
|      | <i>Forficula auricularia</i> | Pennsylvania, USA            | 10                               | 60%                          | Not tested                           | N   | Levitt et al. (2013)       |
|      | <i>Galleria mellonella</i>   | Pennsylvania, USA            | 21                               | 33%                          | Not tested                           | N   | Levitt et al. (2013)       |
|      | Araneae (order)              | Pennsylvania, USA            | 10                               | 10%                          | Not tested                           | N   | Levitt et al. (2013)       |

|                             |                           |                             |                      |                  |                  |                        |                           |
|-----------------------------|---------------------------|-----------------------------|----------------------|------------------|------------------|------------------------|---------------------------|
| ABPV                        | <i>B. lucorum</i>         | n/a experimental infections | No data              | No data          | Not tested       | Y                      | Bailey and Gibbs (1964)   |
|                             |                           | Scotland, UK                | Unpublished data     | Unpublished data | Unpublished data | N                      | Wilfert unpublished       |
|                             | <i>B. ruderarius</i>      | n/a experimental infections | No data              | No data          | Not tested       | Y                      | Bailey and Gibbs (1964)   |
|                             | <i>B. terrestris</i>      | n/a experimental infections | No data              | No data          | Not tested       | Y                      | Bailey and Gibbs (1964)   |
|                             |                           | Scotland, UK                | Unpublished data     | Unpublished data | Unpublished data | N                      | Wilfert unpublished       |
|                             | <i>B. hortorum</i>        | n/a experimental infections | No data              | No data          | Not tested       | Y                      | Bailey and Gibbs (1964)   |
|                             |                           | Scotland, UK                | Unpublished data     | Unpublished data | Unpublished data | N                      | Wilfert unpublished       |
|                             | <i>B. pascuorum</i>       | n/a experimental infections | No data              | No data          | Not tested       | N                      | Bailey and Gibbs (1964)** |
|                             |                           | Scotland, UK                | Unpublished data     | Unpublished data | Unpublished data | N                      | Wilfert unpublished       |
|                             | <i>V. destructor</i>      | France (nationwide)         | 22,000 (22 apiaries) | 36%              | Not tested       | n/a                    | Tentcheva et al. (2004)   |
| France (360 colonies)       |                           | 36,000                      | low                  | Not tested       | n/a              | Gauthier et al. (2007) |                           |
| SBPV                        | <i>B. terrestris</i>      | Scotland, UK                | Unpublished data     | Unpublished data | Unpublished data | N                      | Wilfert unpublished       |
|                             |                           | Scotland, UK                | Unpublished data     | Unpublished data | Unpublished data | N                      | Wilfert unpublished       |
|                             | <i>B. pascuorum</i>       | Scotland, UK                | Unpublished data     | Unpublished data | Unpublished data | N                      | Wilfert unpublished       |
|                             | <i>B. lucorum</i>         | Scotland, UK                | Unpublished data     | Unpublished data | Unpublished data | N                      | Wilfert unpublished       |
|                             | <i>B. hortorum</i>        | Scotland, UK                | Unpublished data     | Unpublished data | Unpublished data | N                      | Wilfert unpublished       |
|                             | <i>Eristalis pertinax</i> | Scotland, UK                | Unpublished data     | Unpublished data | Unpublished data | N                      | Wilfert unpublished       |
| <i>Episyrrhus balteatus</i> | Scotland, UK              | Unpublished data            | Unpublished data     | Unpublished data | N                | Wilfert unpublished    |                           |
| SBV                         | <i>B. ternarius</i>       | Pennsylvania, USA           | 2                    | 50%              | Not tested       | N                      | Singh et al. (2010)       |
|                             |                           | Pennsylvania, USA           | 1                    | 100%/            | Not tested       | N                      | Singh et al. (2010)       |
|                             | <i>B. vagans</i>          | Pennsylvania, USA           | 2                    | 50%              | Not tested       | N                      | Levitt et al. (2013)      |
|                             |                           | Pennsylvania, USA           | 13                   | 23%              | Not tested       | N                      | Levitt et al. (2013)      |
|                             | <i>V. vulgaris</i>        | Pennsylvania, USA           | 7                    | 57%              | Not tested       | N                      | Singh et al. (2010)       |
|                             |                           | UK, mainly southwest        | 45                   | 0.45%            | Not tested       | N                      | Evison et al. (2012)      |
|                             | <i>Vespula spp.</i>       | Pennsylvania, USA           | 7                    | 0.07%            | Not tested       | N                      | Levitt et al. (2013)      |
|                             | <i>Blatella germanica</i> | Pennsylvania, USA           | 8                    | 75%              | Not tested       |                        | Levitt et al. (2013)      |
| <i>Aethina tumida</i>       | Pennsylvania, USA         | 21                          | 11%                  | Not tested       | N                | Levitt et al. (2013)   |                           |

|      |                              |                     |                      |             |                            |     |                         |
|------|------------------------------|---------------------|----------------------|-------------|----------------------------|-----|-------------------------|
|      | <i>Forficula auricularia</i> | Pennsylvania, USA   | 10                   | 50%         | Not tested                 | N   | Levitt et al. (2013)    |
|      | <i>Galleria mellonella</i>   | Pennsylvania, USA   | 21                   | 29%         | Not tested                 | N   | Levitt et al. (2013)    |
|      | Araneae (order)              | Pennsylvania, USA   | 10                   | 10%         | Not tested                 | N   | Levitt et al. (2013)    |
|      | <i>V. destructor</i>         | Penn State, USA     | 111 (one hive)       | no data     | Not tested                 | n/a | Shen et al. (2005)      |
|      |                              | France (nationwide) | 22,000 (22 apiaries) | 45%         | Not tested                 | n/a | Tentcheva et al. (2004) |
| KBV  | <i>A. cerana</i>             | India, Kashmir      | No data              | No data     | Not tested                 | Y   | Bailey and Woods (1977) |
|      | <i>Aethina tumida</i>        | Pennsylvania, USA   | 21                   | 44%         | Not tested                 | N   | Levitt et al. (2013)    |
|      | <i>Forficula auricularia</i> | Pennsylvania, USA   | 10                   | 20%         | Not tested                 | N   | Levitt et al. (2013)    |
|      | <i>Galleria mellonella</i>   | Pennsylvania, USA   | 21                   | 29%         | Not tested                 | N   | Levitt et al. (2013)    |
|      | <i>V. destructor</i>         | France (nationwide) | 22,000 (22 apiaries) | 5%          | Not tested                 | n/a | Tentcheva et al. (2004) |
|      | <i>V. destructor</i>         | Penn State, USA     | 111 (one hive)       | No data     | Not tested                 | n/a | Shen et al. (2005)      |
| IAPV | <i>B. impatiens</i>          | Pennsylvania, USA   | 13                   | 31%         | Y                          | N   | Levitt et al. (2013)    |
|      | <i>B. ternarius</i>          | Pennsylvania, USA   | 2                    | 100%        | Not tested                 | N   | Singh et al. (2010)     |
|      | <i>B. vagans</i>             | Pennsylvania, USA   | 1                    | 100%        | Not tested                 | N   | Singh et al. (2010)     |
|      | <i>V. vulgaris</i>           | Pennsylvania, USA   | 7                    | ~71%        | Not tested                 | N   | Singh et al. (2010)     |
|      | <i>Vespa velutina</i>        | Hangzhou, China     | 10                   | 100%        | Y (head, thorax & abdomen) | N   | Yañez et al. (2012)     |
|      | <i>A. cerana</i>             | Hangzhou, China     | 180 (6 hives)        | 1 hive only | N***                       | N   | Yañez et al. (2012)     |
|      | <i>Aethina tumida</i>        | Pennsylvania, USA   | 21                   | 78%         | Not tested                 | N   | Levitt et al. (2013)    |
|      | <i>Forficula auricularia</i> | Pennsylvania, USA   | 10                   | 40%         | Not tested                 | N   | Levitt et al. (2013)    |
|      | <i>Galleria mellonella</i>   | Pennsylvania, USA   | 21                   | 14%         | Not tested                 | N   | Levitt et al. (2013)    |
|      | Araneae (order)              | Pennsylvania, USA   | 10                   | 10%         | Not tested                 | N   | Levitt et al. (2013)    |
|      | <i>V. destructor</i>         | n/a (experimental)  | 40                   | n/a         | Y                          | n/a | Di Prisco et al. (2011) |
| CBPV | <i>Camponotus vagus</i>      | France              | 22 (from 2 apiaries) | No data     | Y                          | N   | Celle et al. (2008)     |
|      | <i>Formica rufa</i>          | France              | 20 (from 2 apiaries) | No data     | N                          | N   | Celle et al. (2008)     |
|      | <i>V. destructor</i>         | France              | 19 (from 1 apiary)   | No data     | Y                          | n/a | Celle et al. (2008)     |

\* Bumblebees had deformed wings and were found to be positive for DWV by PCR. However, it is not proven that the symptoms are linked to the virus.

\*\* The authors use the now out-of-date name *Bombus agrorum* to refer to *B. pascuorum*

\*\*\*The authors do not believe this result to be true as replication occurred in *A. mellifera* and the two species are so similar that it seems unlikely replication does not occur in *A. cerana* as well (Yañez et al. 2012)

## References

- Bailey, L. and A. J. Gibbs. 1964. Acute infection of bees with paralysis virus. *Journal of Insect Pathology* **6**:395-407.
- Bailey, L. and R. D. Woods. 1977. 2 more small RNA viruses from honey bees and further observations on Sacbrood and Acute Bee Paralysis Viruses. *Journal of General Virology* **37**:175-182.
- Bowen-Walker, P. L., S. J. Martin, and A. Gunn. 1999. The transmission of deformed wing virus between honeybees (*Apis mellifera* L.) by the ectoparasitic mite *Varroa jacobsoni* Oud. *Journal of Invertebrate Pathology* **73**:101-106.
- Celle, O., P. Blanchard, V. Olivier, F. Schurr, N. Cougoule, J. P. Faucon, and M. Ribière. 2008. Detection of Chronic Bee Paralysis Virus (CBPV) genome and its replicative RNA form in various hosts and possible ways of spread. *Virus Research* **133**:280-284.
- Di Prisco, G., F. Pennacchio, E. Caprio, H. F. Boncristiani Jr, J. Evans, and Y. Chen. 2011. *Varroa destructor* is an effective vector of Israeli acute paralysis virus in the honeybee, *Apis mellifera*. *Journal of General Virology* **92**:151-155.
- Evison, S. E. F., K. E. Roberts, L. Laurenson, S. Pietravalle, J. Hui, J. C. Biesmeijer, J. E. Smith, G. Budge, and W. O. H. Hughes. 2012. Pervasiveness of parasites in pollinators. *PLoS ONE* **7**:e30641.
- Fürst, M. A., D. P. McMahon, J. L. Osborne, R. J. Paxton, and M. J. F. Brown. 2014. Disease associations between honeybees and bumblebees as a threat to wild pollinators. *Nature* **506**:364-366.
- Gauthier, L., D. Tentcheva, M. Tournaire, B. Dainat, F. Cousserans, M. E. Colin, and M. Bergoin. 2007. Viral load estimation in asymptomatic honey bee colonies using the quantitative RT-PCR technique. *Apidologie* **38**:426-435.
- Genersch, E., C. Yue, I. Fries, and J. R. De Miranda. 2006. Detection of Deformed Wing Virus, a honey bee viral pathogen, in bumble bees (*Bombus terrestris* and *Bombus pascuorum*) with wing deformities. *Journal of Invertebrate Pathology* **91**:61-63.
- Levitt, A. L., R. Singh, D. L. Cox-Foster, E. Rajotte, K. Hoover, N. Ostiguy, and E. C. Holmes. 2013. Cross-species transmission of honey bee viruses in associated arthropods. *Virus Research* **176**:232-240.
- Li, J., W. Peng, J. Wu, J. P. Strange, H. Boncristiani, and Y. Chen. 2011. Cross-species infection of deformed wing virus poses a new threat to pollinator conservation. *Journal of Economic Entomology* **104**:732-739.
- Li, J., H. Qin, J. Wu, B. M. Sadd, X. Wang, J. Evans, W. Peng, and Y. Chen. 2012. The prevalence of parasites and pathogens in Asian honeybees *Apis cerana* in China. *PLoS ONE* **7**:e47955.
- Peng, W., J. Li, H. F. Boncristiani Jr, J. P. Strange, M. Hamilton, and Y. P. Chen. 2011. Host range expansion of honey bee Black Queen Cell Virus in the bumble bee, *Bombus huntii*. *Apidologie* **42**:650-658.
- Ravoet, J., L. De Smet, I. Meeus, G. Smagge, T. Wenseleers, and D. C. de Graaf. 2014. Widespread occurrence of honey bee pathogens in solitary bees. *Journal of Invertebrate Pathology* **122**:55-58.
- Shen, M., L. Cui, N. Ostiguy, and D. L. Cox-Foster. 2005. Intricate transmission routes and interactions between picorna-like viruses (Kashmir bee virus and Sacbrood virus) with the honeybee host and the parasitic varroa mite. *Journal of General Virology* **86**:2281-2289.
- Singh, R., A. L. Levitt, E. G. Rajotte, E. C. Holmes, N. Ostiguy, S. vanEngelsdorp, W. I. Lipkin, C. W. dePamphillis, A. L. Toth, and D. L. Cox-Foster. 2010. RNA viruses in hymenopteran pollinators: Evidence of inter-taxa virus transmission via pollen and potential impact on non-*Apis* hymenopteran species. *PLoS ONE* **5**:e14357.
- Tentcheva, D., L. Gauthier, N. Zappulla, B. Dainat, F. Cousserans, M. E. Colin, and M. Bergoin. 2004. Prevalence and seasonal variations of six bee viruses in *Apis mellifera* L. and *Varroa destructor* mite populations in France. *Applied and Environmental Microbiology* **70**:7185-7191.

- Yañez, O., H. Zheng, F. Hu, P. Neumann, and V. Dietemann. 2012. A scientific note on Israeli acute paralysis virus infection of Eastern honeybee *Apis cerana* and vespine predator *Vespa velutina*. *Apidologie* **43**:587-589.
- Yue, C. and E. Genersch. 2005. RT-PCR analysis of *Deformed wing virus* in honeybees (*Apis mellifera*) and mites (*Varroa destructor*). *Journal of General Virology* **86**:3419-3424.
- Zhang, X., S. Y. He, J. D. Evans, J. S. Pettis, G. F. Yin, and Y. P. Chen. 2012. New evidence that Deformed wing virus and Black queen cell virus are multi-host pathogens. *Journal of Invertebrate Pathology* **109**:156-159.
